# Supplementary material for: Use of a rare disease registry for establishing phenotypic classification of previously unassigned GLA variants: a consensus classification system by a multispecialty Fabry disease genotype–phenotype workgroup
Source: PubMed Central journal article supplement — J Med Genet. 2020 Mar 11;57(8):542–51. doi: 10.1136/jmedgenet-2019-106467 (PMC7418626; doi:10.1136/jmedgenet-2019-106467), 2020-03-11
Supplement: jmedgenet-2019-106467supp001.pdf [file jmedgenet-2019-106467supp001.pdf]

**SUPPLEMENTARY FILE, includes:**

Supplementary Methods  
 Supplementary References  
 Supplementary Table 1  
 Supplementary Table 2

**SUPPLEMENTARY METHODS****Details on *GLA* variant 2-point scoring and validation**

The *GLA* variant 2-point scoring system derived from patients' Fabry Registry data was developed based on a modification of published criteria for classic Fabry disease in male patients.<sup>1</sup> Briefly, van der Tol et al.<sup>1</sup> used strict criteria to identify patients with a classic phenotype based on severely decreased or absent  $\alpha$ -galactosidase activity in leukocytes of males and presence of at least one of the Fabry disease-specific clinical characteristics of acroparaesthesia, angiokeratomas and cornea verticillata. In the present initiative, acroparaesthesia was not used as a criterion because it was deemed to be too subjective and may result from carpal tunnel syndrome, which appears to have a higher prevalence in Fabry patients than in the general population.<sup>2</sup>  $\alpha$ -galactosidase activity records were insufficient for the assessment. The *GLA* variant 2-point scores used in Stage 2 were calculated as follows: Total of positive Fabry Registry responses of diffuse angiokeratomas or cornea verticillata for the *GLA* variant divided by the total Fabry Registry responses ('yes' and 'no') of diffuse angiokeratomas and cornea verticillata status for that variant as a percentage. An example of calculation is provided below.

| Male patients<br>with the specific<br><i>GLA</i> variant | Fabry Registry responses |                                                       |           |                                                            |
|----------------------------------------------------------|--------------------------|-------------------------------------------------------|-----------|------------------------------------------------------------|
|                                                          | Available                | Angiokeratomas<br>'Yes' (present) or<br>'No' (absent) | Available | Cornea verticillata<br>'Yes' (present) or<br>'No' (absent) |
| Patient #1                                               | Yes                      | Yes                                                   | Yes       | Yes                                                        |
| Patient #2                                               | No                       | -                                                     | Yes       | Yes                                                        |
| Patient #3                                               | Yes                      | Yes                                                   | Yes       | No                                                         |
| Patient #4                                               | Yes                      | Yes                                                   | No        | -                                                          |

2-point score calculation:

- Total of positive responses of angiokeratomas or cornea verticillata = 5.
- Total of responses ('yes' and 'no') of angiokeratomas or cornea verticillata status = 6.
- 2-point score = 0.83 (i.e. 5/6) X 100% = 83%

**SUPPLEMENTARY REFERENCES**

1. van der Tol L, Smid BE, Poorthuis BJ, Biegstraaten M, Deprez RH, Linthorst GE, Hollak CE. A systematic review on screening for Fabry disease: prevalence of individuals with genetic variants of unknown significance. *J Med Genet* 2014;51:1–9.
2. Ghali J, Murugasu A, Day T, Nicholls K. Carpal tunnel syndrome in Fabry disease. *JIMD Rep* 2012;2:17–23.

**Supplementary Table 1.** The 55 *GLA* variants included in Stage 1. The variants had been reported to the Fabry Registry for  $\geq 5$  Fabry patients (males or females) and lacked fabry-database.org phenotype classification.

| <b>GLA variants (n=55)</b> | <b>Variant type</b> | <b>Classification in fabry-database.org<sup>a</sup></b> | <b>Preliminary workgroup classification in Stage 1 for variants subsequently included in Stage 2<sup>b</sup></b> |
|----------------------------|---------------------|---------------------------------------------------------|------------------------------------------------------------------------------------------------------------------|
| p.Gln283*                  | Nonsense            | Blank                                                   | Classic                                                                                                          |
| p.Trp162*                  | Nonsense            | Blank                                                   | Classic                                                                                                          |
| p.Trp44Cys                 | Missense            | Blank                                                   | Classic                                                                                                          |
| p.Ser345Pro                | Missense            | Blank                                                   | Unclassified                                                                                                     |
| p.Ala156Thr                | Missense            | Blank                                                   | Classic                                                                                                          |
| p.Thr194Ile                | Missense            | Blank                                                   | Classic                                                                                                          |
| p.Pro259Arg                | Missense            | Blank                                                   | Classic                                                                                                          |
| p.Thr410Ile                | Missense            | Blank                                                   | Classic                                                                                                          |
| p.Ser238Asn                | Missense            | Blank                                                   | Classic                                                                                                          |
| p.Arg363His                | Missense            | Blank                                                   | Later-onset                                                                                                      |
| p.Ala143Thr                | Missense            | Blank                                                   | Unclassified                                                                                                     |
| p.Asp322Glu                | Missense            | Blank                                                   | Unclassified                                                                                                     |
| c.1188_1189ins             | Frameshift          | Absent                                                  | Classic                                                                                                          |
| p.Glu358del                | Small deletion      | Blank                                                   | Classic                                                                                                          |
| p.Gln416*                  | Nonsense            | Blank                                                   | Not included in Stage 2                                                                                          |
| p.Asp136Tyr                | Missense            | Blank                                                   | Not included in Stage 2                                                                                          |
| p.Ile242Phe                | Missense            | Blank                                                   | Not included in Stage 2                                                                                          |
| p.Leu16Pro                 | Missense            | Blank                                                   | Not included in Stage 2                                                                                          |
| p.Cys63Tyr                 | Missense            | Blank                                                   | Not included in Stage 2                                                                                          |
| p.Ile232Thr                | Missense            | Blank                                                   | Not included in Stage 2                                                                                          |
| p.Glu7*                    | Nonsense            | Blank                                                   | Not included in Stage 2                                                                                          |
| p.Trp47*                   | Nonsense            | Blank                                                   | Not included in Stage 2                                                                                          |
| p.Leu243*                  | Nonsense            | Blank                                                   | Not included in Stage 2                                                                                          |
| p.Gln280*                  | Nonsense            | Absent                                                  | Not included in Stage 2                                                                                          |
| p.Leu403*                  | Nonsense            | Blank                                                   | Not included in Stage 2                                                                                          |
| p.Phe18Ser                 | Missense            | Blank                                                   | Not included in Stage 2                                                                                          |
| p.Cys52Gly                 | Missense            | Blank                                                   | Not included in Stage 2                                                                                          |
| p.Pro60Leu                 | Missense            | Blank                                                   | Not included in Stage 2                                                                                          |
| p.Gly85Asn                 | Missense            | Blank                                                   | Not included in Stage 2                                                                                          |
| p.Cys90Arg                 | Missense            | Absent                                                  | Not included in Stage 2                                                                                          |
| p.Asp92Asn                 | Missense            | Blank                                                   | Not included in Stage 2                                                                                          |
| p.Leu129Pro                | Missense            | Blank                                                   | Not included in Stage 2                                                                                          |
| p.Ile270Thr                | Missense            | Blank                                                   | Not included in Stage 2                                                                                          |
| p.Ala292Thr                | Missense            | Blank                                                   | Not included in Stage 2                                                                                          |
| p.Leu294Ser                | Missense            | Absent                                                  | Not included in Stage 2                                                                                          |
| p.Leu300Pro                | Missense            | Blank                                                   | Not included in Stage 2                                                                                          |
| p.Gly325Asp                | Missense            | Blank                                                   | Not included in Stage 2                                                                                          |

| <b>GLA variants (n=55)</b>  | <b>Variant type</b> | <b>Classification in fabry-database.org<sup>a</sup></b> | <b>Preliminary workgroup classification in Stage 1 for variants subsequently included in Stage 2<sup>b</sup></b> |
|-----------------------------|---------------------|---------------------------------------------------------|------------------------------------------------------------------------------------------------------------------|
| p.Gly325Ser                 | Missense            | Absent                                                  | Not included in Stage 2                                                                                          |
| p.Ile354Lys                 | Missense            | Blank                                                   | Not included in Stage 2                                                                                          |
| p.Arg363Pro                 | Missense            | Absent                                                  | Not included in Stage 2                                                                                          |
| p.Thr412Asn                 | Missense            | Absent                                                  | Not included in Stage 2                                                                                          |
| p.Leu415Pro                 | Missense            | Blank                                                   | Not included in Stage 2                                                                                          |
| g.IVS2-2A>G                 | Splice site         | Blank                                                   | Not included in Stage 2                                                                                          |
| g.IVS3-1G>C                 | Splice site         | Blank                                                   | Not included in Stage 2                                                                                          |
| g.IVS4-2A>T                 | Splice site         | Blank                                                   | Not included in Stage 2                                                                                          |
| g.IVS5-2_-3del <sup>c</sup> | Splice site         | Absent                                                  | Not included in Stage 2                                                                                          |
| g.IVS5-3_-2del <sup>c</sup> | Splice site         | Absent                                                  | Not included in Stage 2                                                                                          |
| g.IVS6-1G>A                 | Splice site         | Blank                                                   | Not included in Stage 2                                                                                          |
| g.IVS6-10G>A                | Splice site         | Absent                                                  | Not included in Stage 2                                                                                          |
| c.265delC                   | Frameshift          | Absent                                                  | Not included in Stage 2                                                                                          |
| c.734_792del                | Frameshift          | Absent                                                  | Not included in Stage 2                                                                                          |
| c.993_994insA               | Frameshift          | Absent                                                  | Not included in Stage 2                                                                                          |
| c.EX2del                    | Large deletion      | Absent                                                  | Not included in Stage 2                                                                                          |
| p.Arg404del                 | Small deletion      | Blank                                                   | Not included in Stage 2                                                                                          |
| p.G395_F396ins              | Small insertion     | Absent                                                  | Not included in Stage 2                                                                                          |

<sup>a</sup> fabry-database.org classification field “blank” (not classified) or classification “absent” (*GLA* variant not listed).

<sup>b</sup> Preliminary classification based on workgroup member’s personal clinical observations made in Fabry patients with *GLA* variants included in the research, on evaluation of published scientific and medical literature and, if possible, on review of the variant’s potential deleterious impact on the *GLA* gene and/or  $\alpha$ -galactosidase function in light of established molecular mechanisms. Phenotypes associated with ‘pathogenic’ *GLA* variants include ‘classic’ and ‘later-onset’ phenotypes. Reasons for not including variants in Stage 2 were insufficient 2-point scoring data (angiokeratomas or cornea verticillata) for a particular variant or categorization of variant as ‘likely benign’ or ‘benign’ not warranting in-depth investigation (see Methods section).

<sup>c</sup> *GLA* variants may be identical.

\*, translation termination codon.

Supplementary table 2. Comparison of workgroup consensus phenotype classifications with results from disease databases and prediction algorithms

| GLA variants (n=33) | Variant type   | Fabry Disease Genotype-Phenotype Workgroup Phenotype classification | dbfpg disease database Phenotype classification | ClinVar disease database Phenotype classification                                       | LOVD disease database Phenotype classification | PolyPhen-2 prediction algorithm      |                                           | SIFT prediction algorithm |                                               | MutationTaster prediction algorithm |                                           |                 |
|---------------------|----------------|---------------------------------------------------------------------|-------------------------------------------------|-----------------------------------------------------------------------------------------|------------------------------------------------|--------------------------------------|-------------------------------------------|---------------------------|-----------------------------------------------|-------------------------------------|-------------------------------------------|-----------------|
|                     |                |                                                                     |                                                 |                                                                                         |                                                | Affecting GLA function (as reported) | Score, range 0-1 (missense variants only) | Prediction                | Score, cut-off <0.05 (missense variants only) | Prediction                          | Score, range 0-1 (missense variants only) | Prediction      |
| p.Gln283*           | Nonsense       | Classic                                                             | Classic                                         | Pathogenic                                                                              | NR                                             | Affects function                     | NA                                        | NA                        | NA                                            | NA                                  | 1                                         | Disease causing |
| p.Trp162*           | Nonsense       | Classic                                                             | Classic                                         | Pathogenic                                                                              | NR                                             | Affects function                     | NA                                        | NA                        | NA                                            | NA                                  | 1                                         | Disease causing |
| p.Trp44Cys          | Missense       | Classic                                                             | Classic                                         | Uncertain                                                                               | NR                                             | Effect unknown                       | 1.000                                     | Probably damaging         | 0.000                                         | Damaging                            | 0.999                                     | Disease causing |
| p.Met284Thr         | Missense       | Classic                                                             | Classic                                         | NR                                                                                      | NR                                             | Affects function                     | 1.000                                     | Probably damaging         | 0.001                                         | Damaging                            | 0.999                                     | Disease causing |
| p.Ser345Pro         | Missense       | Classic                                                             | Classic                                         | NR                                                                                      | NR                                             | Affects function                     | 0.972                                     | Probably damaging         | 0.059                                         | Tolerated                           | 0.865                                     | Disease causing |
| p.Ala156Thr         | Missense       | Classic                                                             | Classic                                         | Pathogenic                                                                              | NR                                             | Affects function                     | 1.000                                     | Probably damaging         | 0.003                                         | Damaging                            | 0.999                                     | Disease causing |
| p.Thr194Ile         | Missense       | Classic                                                             | likely classic                                  | NR                                                                                      | NR                                             | Affects function                     | 1.000                                     | Probably damaging         | 0.000                                         | Damaging                            | 0.999                                     | Disease causing |
| p.Ala15Glu          | Missense       | Classic                                                             | Classic                                         | NR                                                                                      | NR                                             | NR                                   | 0.532                                     | possibly damaging         | NR                                            | NR                                  | 0.999                                     | Polymorphism    |
| p.Pro259AnG         | Missense       | Classic                                                             | Classic                                         | Pathogenic                                                                              | NR                                             | Affects function                     | 1.000                                     | Probably damaging         | 0.000                                         | Damaging                            | 0.999                                     | Disease causing |
| p.Trp340AnG         | Missense       | Classic                                                             | Classic                                         | Likely pathogenic                                                                       | NR                                             | Affects function                     | 1.000                                     | Probably damaging         | 0.000                                         | Damaging                            | 0.999                                     | Disease causing |
| p.Thr410Ile         | Missense       | Classic                                                             | Classic                                         | Likely pathogenic                                                                       | NR                                             | Affects function                     | 1.000                                     | Probably damaging         | 0.002                                         | Damaging                            | 0.998                                     | Disease causing |
| p.Ile198Thr         | Missense       | Later-onset                                                         | Later-onset                                     | Conflicting interpretations: Likely pathogenic (n=2); Uncertain (n=1)                   | NR                                             | NR                                   | 1.000                                     | Probably damaging         | 0.002                                         | Damaging                            | 0.999                                     | Disease causing |
| p.Ser238Asn         | Missense       | Later-onset                                                         | Later-onset                                     | Pathogenic                                                                              | NR                                             | Affects function                     | 1.000                                     | Probably damaging         | 0.021                                         | Damaging                            | 0.999                                     | Disease causing |
| p.Arg363His         | Missense       | Later-onset                                                         | Later-onset                                     | Pathogenic                                                                              | NR                                             | Affects function                     | 0.406                                     | Benign                    | 0.465                                         | Tolerated                           | 0.999                                     | Polymorphism    |
| p.Ala143Thr         | Missense       | zyJUS*                                                              | Benign                                          | Conflicting interpretations: Pathogenic (n=2); Likely pathogenic (n=3); Uncertain (n=7) | NR                                             | Affects function                     | 1.000                                     | Probably damaging         | 0.004                                         | Damaging                            | 0.999                                     | Disease causing |
| p.Asp322Glu         | Missense       | Later-onset                                                         | Classic                                         | Pathogenic                                                                              | NR                                             | NR                                   | 0.999                                     | Probably damaging         | 0.000                                         | Damaging                            | 0.975                                     | Disease causing |
| p.Ile117Ser         | Missense       | Later-onset                                                         | Classic                                         | NR                                                                                      | NR                                             | NR                                   | 0.999                                     | Probably damaging         | NR                                            | NR                                  | 0.999                                     | Disease causing |
| c.370-2A>G          | Splice site    | Classic                                                             | Classic                                         | Pathogenic                                                                              | NR                                             | Affects function                     | NA                                        | NA                        | NA                                            | NA                                  | NA                                        | NA              |
| c.802-3_802-2del    | Splice site    | Classic                                                             | Classic                                         | Pathogenic                                                                              | NR                                             | Affects function                     | NA                                        | NA                        | NA                                            | NA                                  | NA                                        | NA              |
| c.548-1G>A          | Splice site    | Classic                                                             | Classic                                         | Pathogenic                                                                              | NR                                             | Affects function                     | NA                                        | NA                        | NA                                            | NA                                  | NA                                        | NA              |
| c.999+2T>C          | Splice site    | Classic                                                             | Classic                                         | Pathogenic                                                                              | NR                                             | Affects function                     | NA                                        | NA                        | NA                                            | NA                                  | NA                                        | NA              |
| c.777del            | Frameshift     | Classic                                                             | Classic                                         | NR                                                                                      | NR                                             | Affects function                     | NA                                        | NA                        | NA                                            | NA                                  | NA                                        | NA              |
| c.1042dup           | Frameshift     | Classic                                                             | Classic                                         | NR                                                                                      | NR                                             | Affects function                     | NA                                        | NA                        | NA                                            | NA                                  | NA                                        | NA              |
| c.57_82del          | Frameshift     | Classic                                                             | Not available                                   | NR                                                                                      | NR                                             | NR                                   | NA                                        | NA                        | NA                                            | NA                                  | NA                                        | NA              |
| c.365_371del        | Frameshift     | Classic                                                             | Not available                                   | NR                                                                                      | NR                                             | NR                                   | NA                                        | NA                        | NA                                            | NA                                  | NA                                        | NA              |
| c.1188_1189insT     | Frameshift     | Classic                                                             | Not available                                   | NR                                                                                      | NR                                             | NR                                   | NA                                        | NA                        | NA                                            | NA                                  | NA                                        | NA              |
| c.568del            | Frameshift     | Classic                                                             | Classic                                         | NR                                                                                      | NR                                             | Affects function                     | NA                                        | NA                        | NA                                            | NA                                  | NA                                        | NA              |
| p.Ser65_Tyr123del   | Large deletion | Classic                                                             | Not available                                   | NR                                                                                      | NR                                             | NR                                   | NA                                        | NA                        | NA                                            | NA                                  | NA                                        | NA              |
| c.1212_1214del      | Small deletion | Classic                                                             | Classic                                         | NR                                                                                      | NR                                             | Affects function                     | NA                                        | NA                        | NA                                            | NA                                  | NA                                        | NA              |
| p.Glu358del         | Small deletion | Classic                                                             | Classic                                         | Pathogenic                                                                              | NR                                             | NR                                   | NA                                        | NA                        | NA                                            | NA                                  | NA                                        | NA              |
| c.639+4A>T          | Intronic       | Classic                                                             | Classic                                         | Uncertain                                                                               | NR                                             | Affects function                     | NA                                        | NA                        | NA                                            | NA                                  | NA                                        | NA              |
| c.1000-10G>A        | Intronic       | Classic                                                             | Not available                                   | NR                                                                                      | NR                                             | NR                                   | NA                                        | NA                        | NA                                            | NA                                  | NA                                        | NA              |
| c.639+919G>A        | Intronic       | Later-onset                                                         | Later-onset                                     | Conflicting interpretations: Pathogenic (n=3); Uncertain (n=1)                          | NR                                             | NR                                   | NA                                        | NA                        | NA                                            | NA                                  | NA                                        | NA              |

\*Genetic variant of unknown significance; experts' opinion in favour of a likely benign GLA variant

dbfpg, International Fabry Disease Genotype-Phenotype Database; LOVD, Leiden Open Variation Database; NA, not applicable; NR, no result available; PolyPhen-2, Polymorphism Phenotyping v2; SIFT, Scale-Invariant Feature Transform
