# Supplementary material for: Use of a rare disease registry for establishing phenotypic classification of previously unassigned GLA variants: a consensus classification system by a multispecialty Fabry disease genotype–phenotype workgroup
Source: HighWire-hosted journal article supplement (doi:10.1136/jmedgenet-2019-106467), 2020-03-11
Supplement: jmedgenet-2019-106467supp001_data_supplement.pdf [file jmedgenet-2019-106467supp001_data_supplement.pdf]

**SUPPLEMENTARY FILE, includes:**

Supplementary Methods  
 Supplementary References  
 Supplementary Table 1  
 Supplementary Table 2

**SUPPLEMENTARY METHODS****Details on GLA variant 2-point scoring and validation**

The *GLA* variant 2-point scoring system derived from patients' Fabry Registry data was developed based on a modification of published criteria for classic Fabry disease in male patients.<sup>1</sup> Briefly, van der Tol et al.<sup>1</sup> used strict criteria to identify patients with a classic phenotype based on severely decreased or absent  $\alpha$ -galactosidase activity in leukocytes of males and presence of at least one of the Fabry disease-specific clinical characteristics of acroparaesthesia, angiokeratomas and cornea verticillata. In the present initiative, acroparaesthesia was not used as a criterion because it was deemed to be too subjective and may result from carpal tunnel syndrome, which appears to have a higher prevalence in Fabry patients than in the general population.<sup>2</sup>  $\alpha$ -galactosidase activity records were insufficient for the assessment. The *GLA* variant 2-point scores used in Stage 2 were calculated as follows: Total of positive Fabry Registry responses of diffuse angiokeratomas or cornea verticillata for the *GLA* variant divided by the total Fabry Registry responses ('yes' and 'no') of diffuse angiokeratomas and cornea verticillata status for that variant as a percentage. An example of calculation is provided below.

| Male patients<br>with the specific<br><i>GLA</i> variant | Fabry Registry responses |                                     |                     |                                     |
|----------------------------------------------------------|--------------------------|-------------------------------------|---------------------|-------------------------------------|
|                                                          | Angiokeratomas           |                                     | Cornea verticillata |                                     |
|                                                          | Available                | 'Yes' (present) or<br>'No' (absent) | Available           | 'Yes' (present) or<br>'No' (absent) |
| Patient #1                                               | Yes                      | Yes                                 | Yes                 | Yes                                 |
| Patient #2                                               | No                       | -                                   | Yes                 | Yes                                 |
| Patient #3                                               | Yes                      | Yes                                 | Yes                 | No                                  |
| Patient #4                                               | Yes                      | Yes                                 | No                  | -                                   |

2-point score calculation:

- Total of positive responses of angiokeratomas or cornea verticillata = 5.
- Total of responses ('yes' and 'no') of angiokeratomas or cornea verticillata status = 6.
- 2-point score = 0.83 (i.e. 5/6) X 100% = 83%

**SUPPLEMENTARY REFERENCES**

1. van der Tol L, Smid BE, Poorthuis BJ, Biegstraaten M, Deprez RH, Linthorst GE, Hollak CE. A systematic review on screening for Fabry disease: prevalence of individuals with genetic variants of unknown significance. *J Med Genet* 2014;51:1–9.
2. Ghali J, Murugasu A, Day T, Nicholls K. Carpal tunnel syndrome in Fabry disease. *JIMD Rep* 2012;2:17–23.

**Supplementary Table 1.** The 55 *GLA* variants included in Stage 1. The variants had been reported to the Fabry Registry for  $\geq 5$  Fabry patients (males or females) and lacked fabry-database.org phenotype classification.

| <b>GLA variants<br/>(n=55)</b> | <b>Variant type</b> | <b>Classification in<br/>fabry-<br/>database.org<sup>a</sup></b> | <b>Preliminary workgroup classification in Stage 1<br/>for variants subsequently included in Stage 2<sup>b</sup></b> |
|--------------------------------|---------------------|------------------------------------------------------------------|----------------------------------------------------------------------------------------------------------------------|
| p.Gln283*                      | Nonsense            | Blank                                                            | Classic                                                                                                              |
| p.Trp162*                      | Nonsense            | Blank                                                            | Classic                                                                                                              |
| p.Trp44Cys                     | Missense            | Blank                                                            | Classic                                                                                                              |
| p.Ser345Pro                    | Missense            | Blank                                                            | Unclassified                                                                                                         |
| p.Ala156Thr                    | Missense            | Blank                                                            | Classic                                                                                                              |
| p.Thr194Ile                    | Missense            | Blank                                                            | Classic                                                                                                              |
| p.Pro259Arg                    | Missense            | Blank                                                            | Classic                                                                                                              |
| p.Thr410Ile                    | Missense            | Blank                                                            | Classic                                                                                                              |
| p.Ser238Asn                    | Missense            | Blank                                                            | Classic                                                                                                              |
| p.Arg363His                    | Missense            | Blank                                                            | Later-onset                                                                                                          |
| p.Ala143Thr                    | Missense            | Blank                                                            | Unclassified                                                                                                         |
| p.Asp322Glu                    | Missense            | Blank                                                            | Unclassified                                                                                                         |
| c.1188_1189ins                 | Frameshift          | Absent                                                           | Classic                                                                                                              |
| p.Glu358del                    | Small deletion      | Blank                                                            | Classic                                                                                                              |
| p.Gln416*                      | Nonsense            | Blank                                                            | Not included in Stage 2                                                                                              |
| p.Asp136Tyr                    | Missense            | Blank                                                            | Not included in Stage 2                                                                                              |
| p.Ile242Phe                    | Missense            | Blank                                                            | Not included in Stage 2                                                                                              |
| p.Leu16Pro                     | Missense            | Blank                                                            | Not included in Stage 2                                                                                              |
| p.Cys63Tyr                     | Missense            | Blank                                                            | Not included in Stage 2                                                                                              |
| p.Ile232Thr                    | Missense            | Blank                                                            | Not included in Stage 2                                                                                              |
| p.Glu7*                        | Nonsense            | Blank                                                            | Not included in Stage 2                                                                                              |
| p.Trp47*                       | Nonsense            | Blank                                                            | Not included in Stage 2                                                                                              |
| p.Leu243*                      | Nonsense            | Blank                                                            | Not included in Stage 2                                                                                              |
| p.Gln280*                      | Nonsense            | Absent                                                           | Not included in Stage 2                                                                                              |
| p.Leu403*                      | Nonsense            | Blank                                                            | Not included in Stage 2                                                                                              |
| p.Phe18Ser                     | Missense            | Blank                                                            | Not included in Stage 2                                                                                              |
| p.Cys52Gly                     | Missense            | Blank                                                            | Not included in Stage 2                                                                                              |
| p.Pro60Leu                     | Missense            | Blank                                                            | Not included in Stage 2                                                                                              |
| p.Gly85Asn                     | Missense            | Blank                                                            | Not included in Stage 2                                                                                              |
| p.Cys90Arg                     | Missense            | Absent                                                           | Not included in Stage 2                                                                                              |
| p.Asp92Asn                     | Missense            | Blank                                                            | Not included in Stage 2                                                                                              |
| p.Leu129Pro                    | Missense            | Blank                                                            | Not included in Stage 2                                                                                              |
| p.Ile270Thr                    | Missense            | Blank                                                            | Not included in Stage 2                                                                                              |
| p.Ala292Thr                    | Missense            | Blank                                                            | Not included in Stage 2                                                                                              |
| p.Leu294Ser                    | Missense            | Absent                                                           | Not included in Stage 2                                                                                              |
| p.Leu300Pro                    | Missense            | Blank                                                            | Not included in Stage 2                                                                                              |
| p.Gly325Asp                    | Missense            | Blank                                                            | Not included in Stage 2                                                                                              |

| <b>GLA variants (n=55)</b>  | <b>Variant type</b> | <b>Classification in fabry-database.org<sup>a</sup></b> | <b>Preliminary workgroup classification in Stage 1 for variants subsequently included in Stage 2<sup>b</sup></b> |
|-----------------------------|---------------------|---------------------------------------------------------|------------------------------------------------------------------------------------------------------------------|
| p.Gly325Ser                 | Missense            | Absent                                                  | Not included in Stage 2                                                                                          |
| p.Ile354Lys                 | Missense            | Blank                                                   | Not included in Stage 2                                                                                          |
| p.Arg363Pro                 | Missense            | Absent                                                  | Not included in Stage 2                                                                                          |
| p.Thr412Asn                 | Missense            | Absent                                                  | Not included in Stage 2                                                                                          |
| p.Leu415Pro                 | Missense            | Blank                                                   | Not included in Stage 2                                                                                          |
| g.IVS2-2A>G                 | Splice site         | Blank                                                   | Not included in Stage 2                                                                                          |
| g.IVS3-1G>C                 | Splice site         | Blank                                                   | Not included in Stage 2                                                                                          |
| g.IVS4-2A>T                 | Splice site         | Blank                                                   | Not included in Stage 2                                                                                          |
| g.IVS5-2_-3del <sup>c</sup> | Splice site         | Absent                                                  | Not included in Stage 2                                                                                          |
| g.IVS5-3_-2del <sup>c</sup> | Splice site         | Absent                                                  | Not included in Stage 2                                                                                          |
| g.IVS6-1G>A                 | Splice site         | Blank                                                   | Not included in Stage 2                                                                                          |
| g.IVS6-10G>A                | Splice site         | Absent                                                  | Not included in Stage 2                                                                                          |
| c.265delC                   | Frameshift          | Absent                                                  | Not included in Stage 2                                                                                          |
| c.734_792del                | Frameshift          | Absent                                                  | Not included in Stage 2                                                                                          |
| c.993_994insA               | Frameshift          | Absent                                                  | Not included in Stage 2                                                                                          |
| c.EX2del                    | Large deletion      | Absent                                                  | Not included in Stage 2                                                                                          |
| p.Arg404del                 | Small deletion      | Blank                                                   | Not included in Stage 2                                                                                          |
| p.G395_F396ins              | Small insertion     | Absent                                                  | Not included in Stage 2                                                                                          |

<sup>a</sup> fabry-database.org classification field “blank” (not classified) or classification “absent” (GLA variant not listed).

<sup>b</sup> Preliminary classification based on workgroup member’s personal clinical observations made in Fabry patients with GLA variants included in the research, on evaluation of published scientific and medical literature and, if possible, on review of the variant’s potential deleterious impact on the GLA gene and/or  $\alpha$ -galactosidase function in light of established molecular mechanisms. Phenotypes associated with ‘pathogenic’ GLA variants include ‘classic’ and ‘later-onset’ phenotypes. Reasons for not including variants in Stage 2 were insufficient 2-point scoring data (angiokeratomas or cornea verticillata) for a particular variant or categorization of variant as ‘likely benign’ or ‘benign’ not warranting in-depth investigation (see Methods section).

<sup>c</sup> GLA variants may be identical.

\*, translation termination codon.

Supplementary table 2. Comparison of workgroup consensus phenotype classifications with results from disease databases and prediction algorithms

| GLA variants<br>(n=33) | Variant type   | Fabry Disease Genotype-<br>Phenotype Workgroup<br>Phenotype classification | dbfpr disease database<br>Phenotype classification | ClinVar disease database<br>Phenotype classification                                    | LOVD disease database<br>Phenotype classification | Affecting GLA function<br>(as reported) | PolyPhen-2 prediction algorithm<br>Score, range 0-1<br>(missense variants only) | Prediction        | SIFT prediction algorithm<br>Score, cut-off <0.05<br>(missense variants only) | Prediction | MutationTaster prediction algorithm<br>Score, range 0-1<br>(missense variants only) | Prediction      |
|------------------------|----------------|----------------------------------------------------------------------------|----------------------------------------------------|-----------------------------------------------------------------------------------------|---------------------------------------------------|-----------------------------------------|---------------------------------------------------------------------------------|-------------------|-------------------------------------------------------------------------------|------------|-------------------------------------------------------------------------------------|-----------------|
| p.Gln283*              | Nonsense       | Classic                                                                    | Classic                                            | Pathogenic                                                                              | NR                                                | Affects function                        | NA                                                                              | NA                | NA                                                                            | NA         | 1                                                                                   | Disease causing |
| p.Trp162*              | Nonsense       | Classic                                                                    | Classic                                            | Pathogenic                                                                              | NR                                                | Affects function                        | NA                                                                              | NA                | NA                                                                            | NA         | 1                                                                                   | Disease causing |
| p.Trp44Cys             | Missense       | Classic                                                                    | Classic                                            | Uncertain                                                                               | NR                                                | Effect unknown                          | 1.000                                                                           | Probably damaging | 0.000                                                                         | Damaging   | 0.999                                                                               | Disease causing |
| p.Met284Thr            | Missense       | Classic                                                                    | Classic                                            | NR                                                                                      | NR                                                | Affects function                        | 1.000                                                                           | Probably damaging | 0.001                                                                         | Damaging   | 0.999                                                                               | Disease causing |
| p.Ser345Pro            | Missense       | Classic                                                                    | Classic                                            | NR                                                                                      | NR                                                | Affects function                        | 0.972                                                                           | Probably damaging | 0.059                                                                         | Tolerated  | 0.865                                                                               | Disease causing |
| p.Ala156Thr            | Missense       | Classic                                                                    | Classic                                            | Pathogenic                                                                              | NR                                                | Affects function                        | 1.000                                                                           | Probably damaging | 0.003                                                                         | Damaging   | 0.999                                                                               | Disease causing |
| p.Thr194Ile            | Missense       | Classic                                                                    | Unlikely classic                                   | NR                                                                                      | NR                                                | Affects function                        | 1.000                                                                           | Probably damaging | 0.000                                                                         | Damaging   | 0.999                                                                               | Disease causing |
| p.Ala15Glu             | Missense       | Classic                                                                    | Classic                                            | NR                                                                                      | NR                                                | NR                                      | 0.532                                                                           | Possibly damaging | NR                                                                            | NR         | 0.999                                                                               | Polymorphism    |
| p.Pro259Arg            | Missense       | Classic                                                                    | Classic                                            | Pathogenic                                                                              | NR                                                | Affects function                        | 1.000                                                                           | Probably damaging | 0.000                                                                         | Damaging   | 0.999                                                                               | Disease causing |
| p.Trp340Arg            | Missense       | Classic                                                                    | Classic                                            | Likely pathogenic                                                                       | NR                                                | Affects function                        | 1.000                                                                           | Probably damaging | 0.000                                                                         | Damaging   | 0.999                                                                               | Disease causing |
| p.Thr410Ile            | Missense       | Classic                                                                    | Classic                                            | Likely pathogenic                                                                       | NR                                                | Affects function                        | 1.000                                                                           | Probably damaging | 0.002                                                                         | Damaging   | 0.998                                                                               | Disease causing |
| p.Ile198Thr            | Missense       | Later-onset                                                                | Later-onset                                        | Conflicting interpretations: Likely pathogenic (n=2); Uncertain (n=1)                   | NR                                                | NR                                      | 1.000                                                                           | Probably damaging | 0.002                                                                         | Damaging   | 0.999                                                                               | Disease causing |
| p.Ser238Asn            | Missense       | Later-onset                                                                | Later-onset                                        | Pathogenic                                                                              | NR                                                | Affects function                        | 1.000                                                                           | Probably damaging | 0.021                                                                         | Damaging   | 0.999                                                                               | Disease causing |
| p.Arg363His            | Missense       | Later-onset                                                                | Later-onset                                        | Pathogenic                                                                              | NR                                                | Affects function                        | 0.406                                                                           | Benign            | 0.465                                                                         | Tolerated  | 0.999                                                                               | Polymorphism    |
| p.Ala143Thr            | Missense       | zygous*                                                                    | Benign                                             | Conflicting interpretations: Pathogenic (n=2); Likely pathogenic (n=3); Uncertain (n=7) | NR                                                | Affects function                        | 1.000                                                                           | Probably damaging | 0.004                                                                         | Damaging   | 0.999                                                                               | Disease causing |
| p.Asp322Glu            | Missense       | Later-onset                                                                | Classic                                            | Pathogenic                                                                              | NR                                                | NR                                      | 0.999                                                                           | Probably damaging | 0.000                                                                         | Damaging   | 0.975                                                                               | Disease causing |
| p.Ile117Ser            | Missense       | Later-onset                                                                | Classic                                            | NR                                                                                      | NR                                                | NR                                      | 0.999                                                                           | Probably damaging | NR                                                                            | NR         | 0.999                                                                               | Disease causing |
| c.370-2A>G             | Splice site    | Classic                                                                    | Classic                                            | Pathogenic                                                                              | NR                                                | Affects function                        | NA                                                                              | NA                | NA                                                                            | NA         | NA                                                                                  | NA              |
| c.802-3_802-2del       | Splice site    | Classic                                                                    | Classic                                            | Pathogenic                                                                              | NR                                                | Affects function                        | NA                                                                              | NA                | NA                                                                            | NA         | NA                                                                                  | NA              |
| c.548-1G>A             | Splice site    | Classic                                                                    | Classic                                            | Pathogenic                                                                              | NR                                                | Affects function                        | NA                                                                              | NA                | NA                                                                            | NA         | NA                                                                                  | NA              |
| c.999+2T>C             | Splice site    | Classic                                                                    | Classic                                            | Pathogenic                                                                              | NR                                                | Affects function                        | NA                                                                              | NA                | NA                                                                            | NA         | NA                                                                                  | NA              |
| c.777del               | Frameshift     | Classic                                                                    | Classic                                            | NR                                                                                      | NR                                                | Affects function                        | NA                                                                              | NA                | NA                                                                            | NA         | NA                                                                                  | NA              |
| c.1042dup              | Frameshift     | Classic                                                                    | Classic                                            | NR                                                                                      | NR                                                | Affects function                        | NA                                                                              | NA                | NA                                                                            | NA         | NA                                                                                  | NA              |
| c.57_82del             | Frameshift     | Classic                                                                    | Not available                                      | NR                                                                                      | NR                                                | NR                                      | NA                                                                              | NA                | NA                                                                            | NA         | NA                                                                                  | NA              |
| c.365_371del           | Frameshift     | Classic                                                                    | Not available                                      | NR                                                                                      | NR                                                | NR                                      | NA                                                                              | NA                | NA                                                                            | NA         | NA                                                                                  | NA              |
| c.1188_1189insT        | Frameshift     | Classic                                                                    | Not available                                      | NR                                                                                      | NR                                                | NR                                      | NA                                                                              | NA                | NA                                                                            | NA         | NA                                                                                  | NA              |
| c.568del               | Frameshift     | Classic                                                                    | Classic                                            | NR                                                                                      | NR                                                | Affects function                        | NA                                                                              | NA                | NA                                                                            | NA         | NA                                                                                  | NA              |
| p.Ser65_Tyr123del      | Large deletion | Classic                                                                    | Not available                                      | NR                                                                                      | NR                                                | NR                                      | NA                                                                              | NA                | NA                                                                            | NA         | NA                                                                                  | NA              |
| c.1212_1214del         | Small deletion | Classic                                                                    | Classic                                            | NR                                                                                      | NR                                                | Affects function                        | NA                                                                              | NA                | NA                                                                            | NA         | NA                                                                                  | NA              |
| p.Glu358del            | Small deletion | Classic                                                                    | Classic                                            | Pathogenic                                                                              | NR                                                | NR                                      | NA                                                                              | NA                | NA                                                                            | NA         | NA                                                                                  | NA              |
| c.639+4A>T             | Intronic       | Classic                                                                    | Classic                                            | Uncertain                                                                               | NR                                                | Affects function                        | NA                                                                              | NA                | NA                                                                            | NA         | NA                                                                                  | NA              |
| c.1000-10G>A           | Intronic       | Classic                                                                    | Not available                                      | NR                                                                                      | NR                                                | NR                                      | NA                                                                              | NA                | NA                                                                            | NA         | NA                                                                                  | NA              |
| c.639+919G>A           | Intronic       | Later-onset                                                                | Later-onset                                        | Conflicting interpretations: Pathogenic (n=3); Uncertain (n=1)                          | NR                                                | NR                                      | NA                                                                              | NA                | NA                                                                            | NA         | NA                                                                                  | NA              |

\*Genetic variant of unknown significance; experts' opinion in favour of a likely benign GLA variant  
dbfpr, International Fabry Disease Genotype-Phenotype Database; LOVD, Leiden Open Variation Database; NA, not applicable; NR, no result available; PolyPhen-2, Polymorphism Phenotyping v2; SIFT, Scale-Invariant Feature Transform
